# Supplementary material
Source: ML conference proceedings conference paper supplement (https://aclanthology.org/2026.semeval-1.312)

Macro F1 Drop: Before vs. After Space Normalization

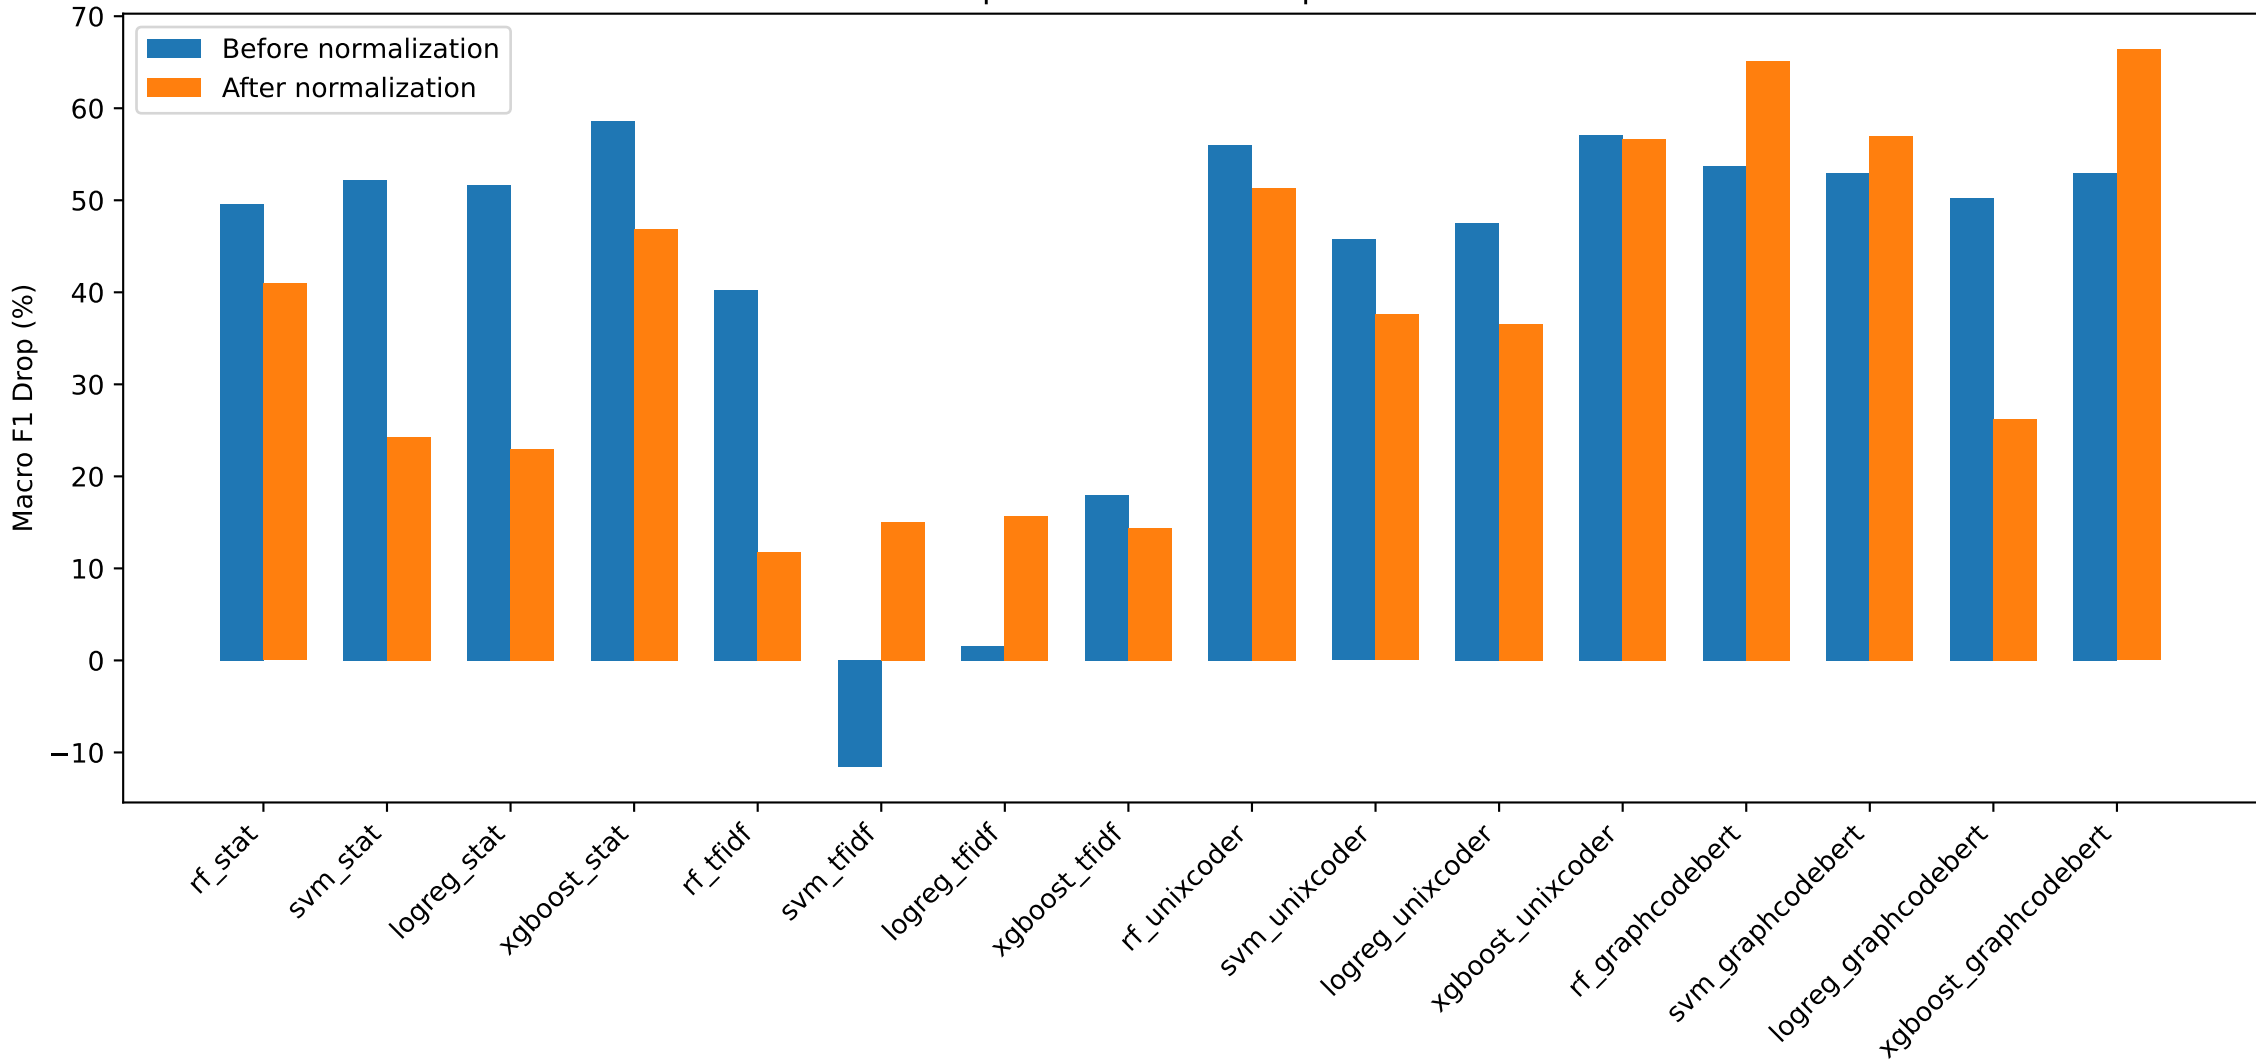

Supplement: SupplementaryMaterial [file f1_drop_comparison.pdf › Group 5 DT166G-Semeval/f1_drop_comparison.pdf]

Macro F1 Score: Validation vs OOD Test Set

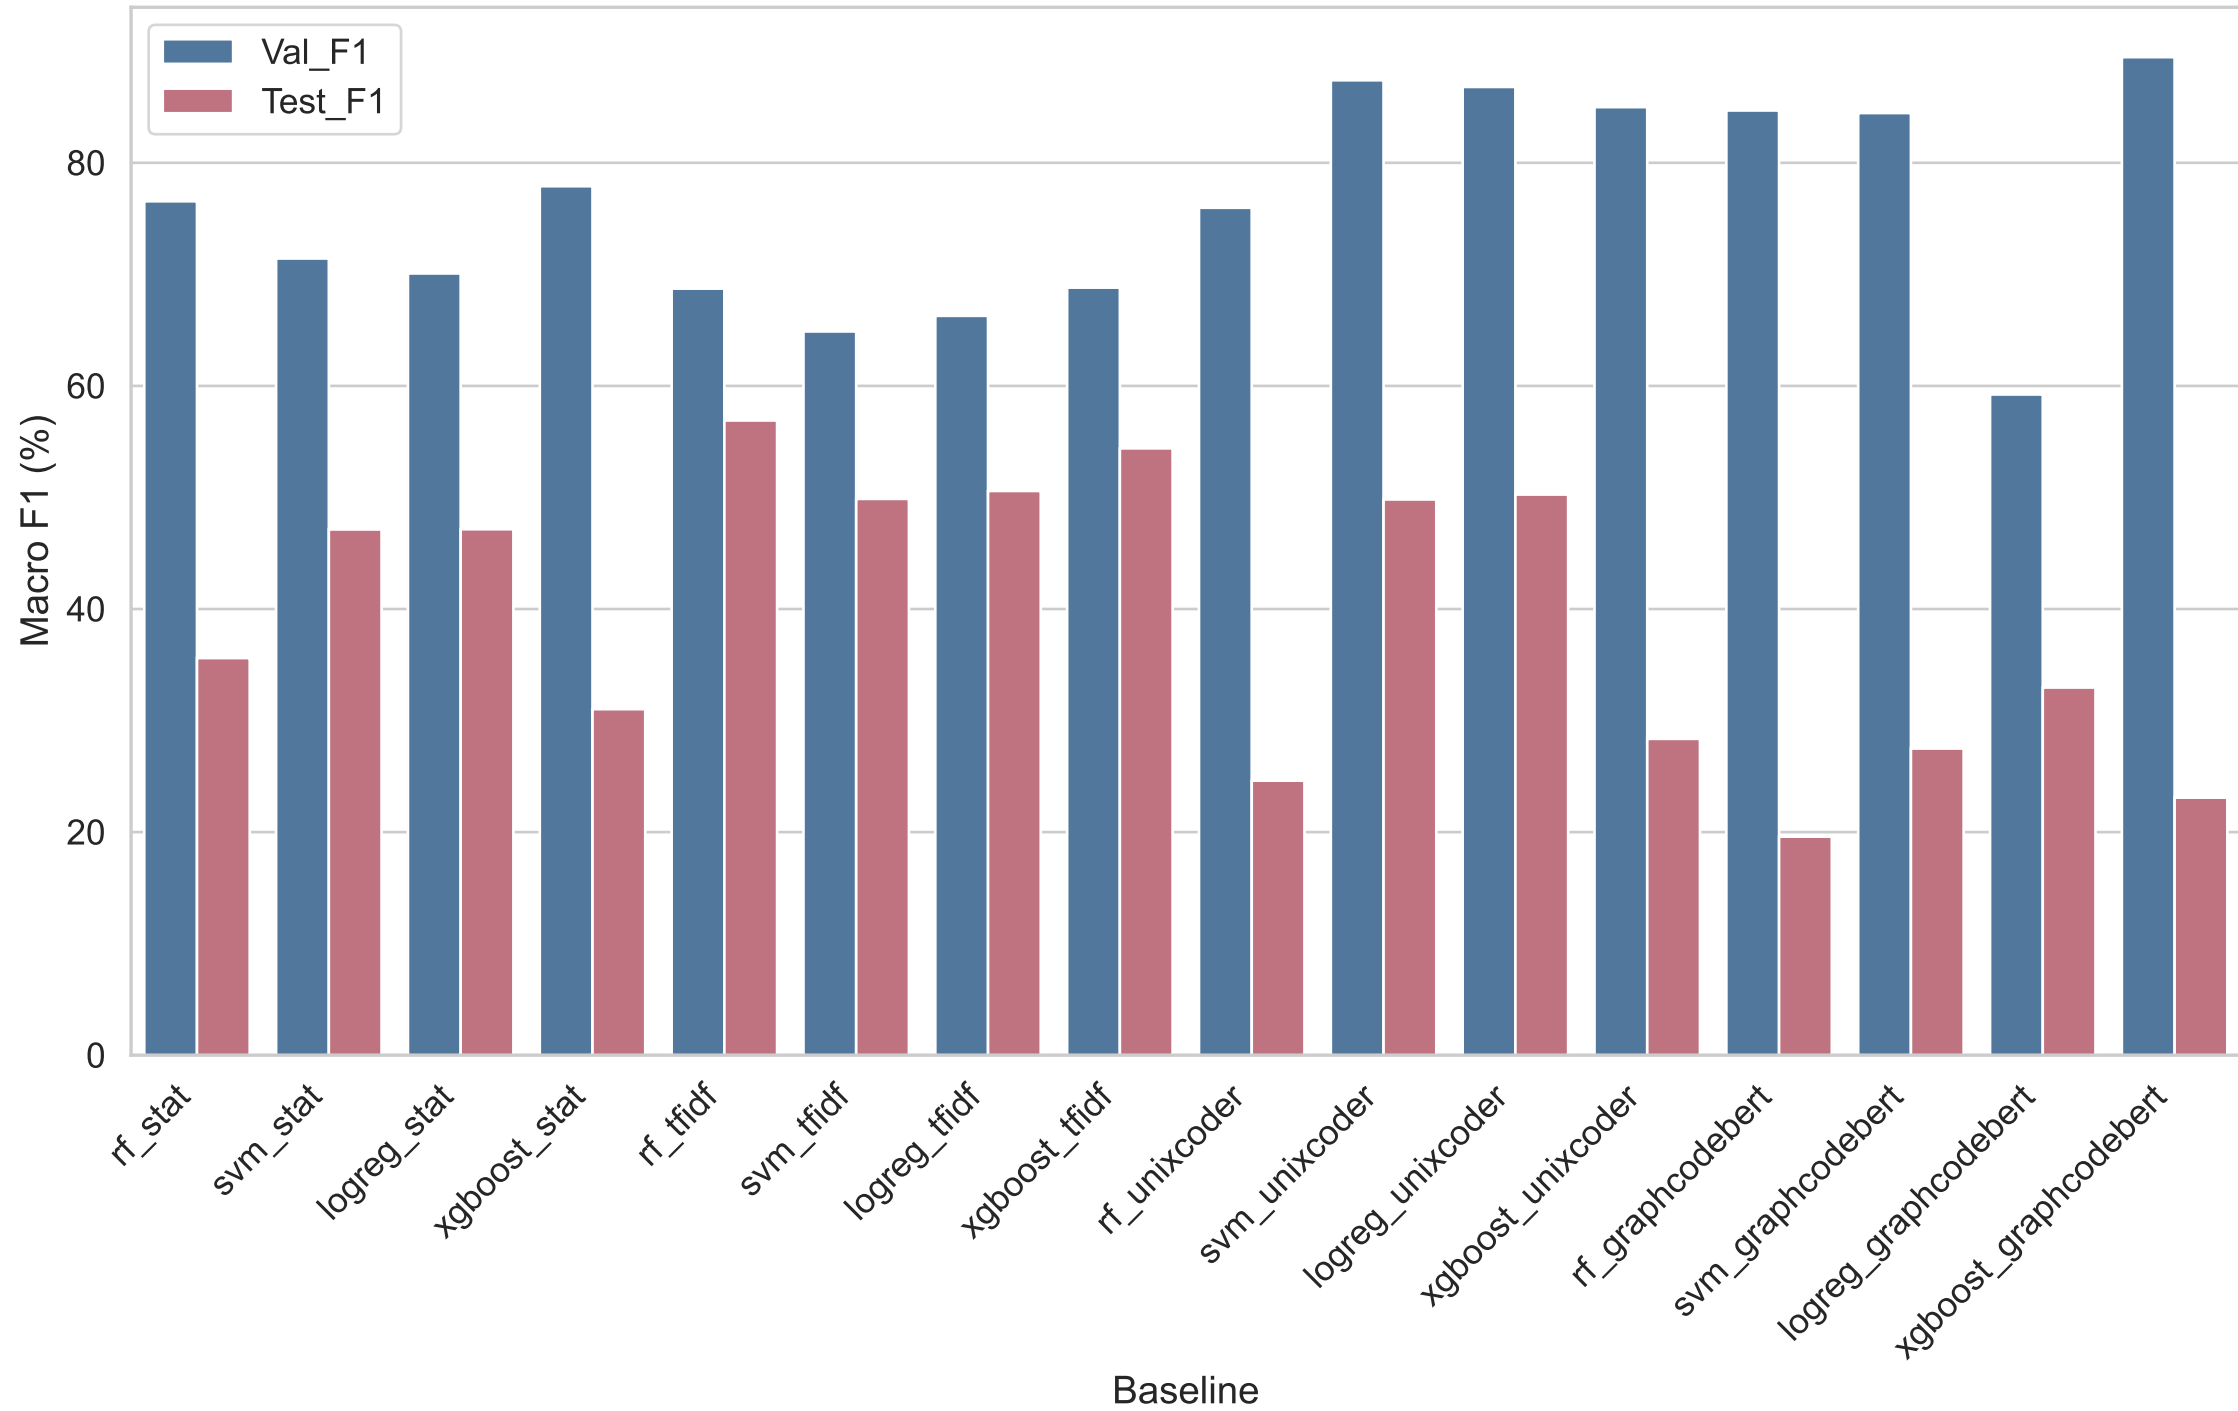

Supplement: SupplementaryMaterial [file macro_f1_val_vs_test.pdf › Group 5 DT166G-Semeval/macro_f1_val_vs_test.pdf]

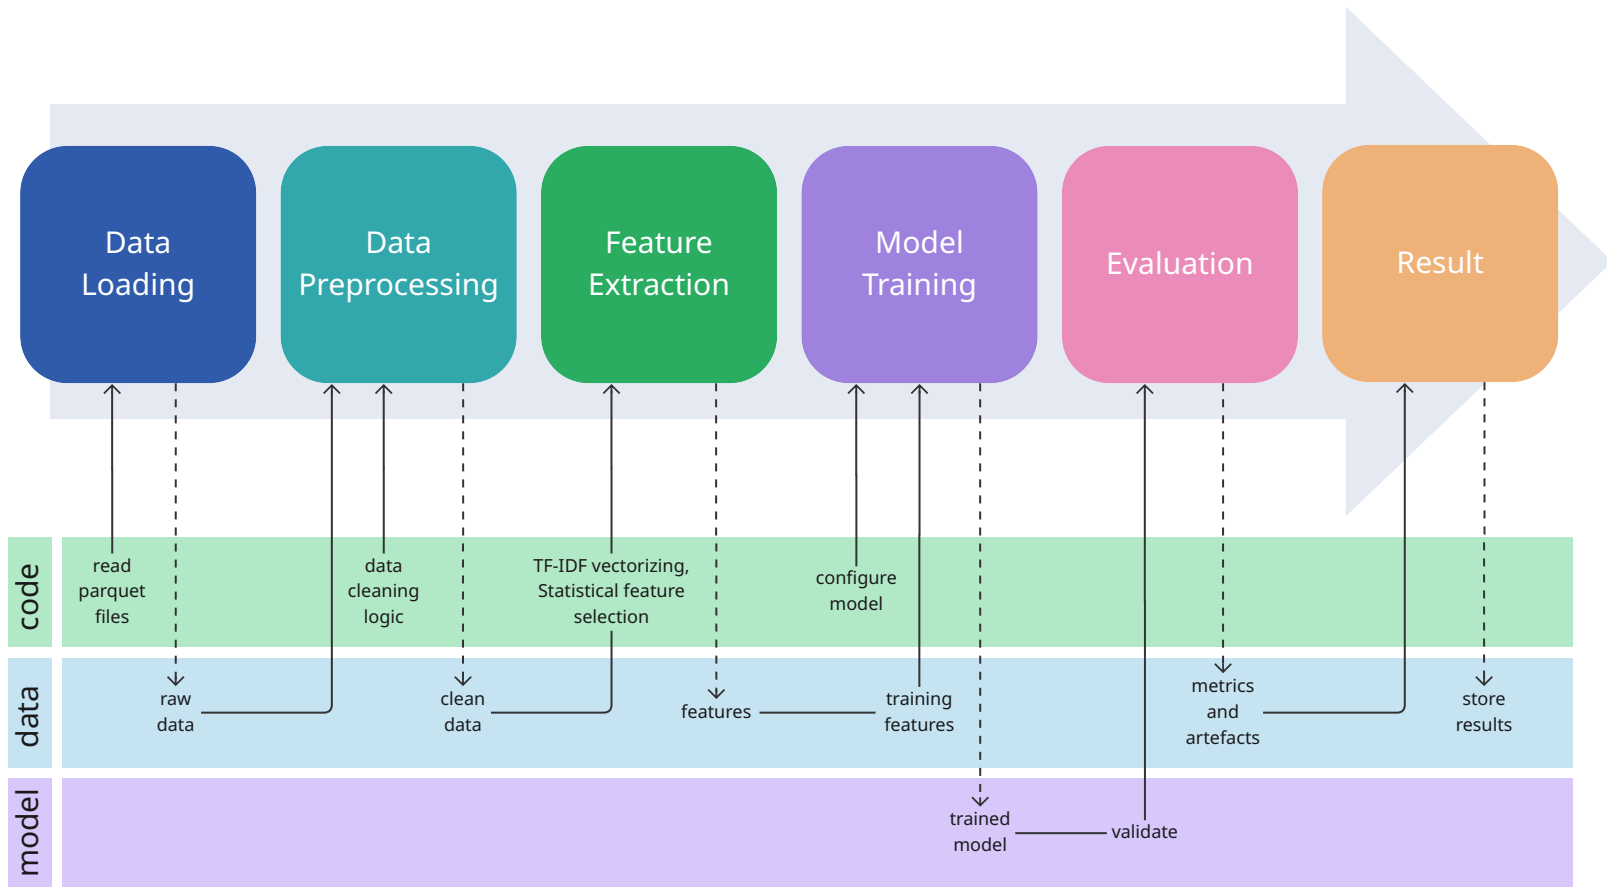

Supplement: SupplementaryMaterial [file pipeline_diagram.pdf › Group 5 DT166G-Semeval/pipeline_diagram.pdf]
